# Supplementary material for: Infective Endocarditis by Moraxella Species: A Systematic Review
Source: MDPI journal article supplement (doi:10.3390/jcm11071854), 2022-03-27
Supplement: s1 [file s1]

**Table S1.** Characteristics of the included studies.

| Study, year published       | Number of patients | Age (years) | Gender | Site of infection, n (%) | Microbiology of infection, n (%) | Treatment administered                                             | Infection Outcomes, n (%)                                                                    |
|-----------------------------|--------------------|-------------|--------|--------------------------|----------------------------------|--------------------------------------------------------------------|----------------------------------------------------------------------------------------------|
| Silberfarb et al, 1968 [23] | 1                  | 77          | Male   | AoV 1 (100)              | <i>M. liquefaciens</i> 1 (100)   | Aminopenicillin 1 (100)                                            | Clinical cure <sup>a</sup><br>0 (0)<br>Deaths<br>overall 1 (100)<br>Deaths due to IE 1 (100) |
| Hewstone et al, 1968 [24]   | 1                  | 12          | Female | NR 1 (100)               | <i>M. lacunata</i> 1 (100)       | Penicillin 1 (100)<br>Aminopenicillin 1 (100)<br>Macrolide 1 (100) | Clinical cure<br>1 (100)<br>Deaths                                                           |

|                             |   |    |        |             |                                      |                                                   |                                                 |
|-----------------------------|---|----|--------|-------------|--------------------------------------|---------------------------------------------------|-------------------------------------------------|
|                             |   |    |        |             |                                      | Chloramphenicol 1 (100)                           | overall 0                                       |
| Douer et al,<br>1977 [25]   | 1 | 45 | Female | NR 1 (100)  | <i>M. catarrhalis</i> 1<br>(100)     | Penicillin 1 (100)                                | Clinical cure<br>1 (100)<br>Deaths<br>overall 0 |
| Bechard et al,<br>1979 [26] | 1 | 50 | Male   | MV 1 (100)  | <i>M. nonliquefaciens</i><br>1 (100) | Aminopenicillin 1 (100)<br>Aminoglycoside 1 (100) | Clinical cure<br>1 (100)<br>Deaths<br>overall 0 |
| Chen et al,<br>1982 [27]    | 1 | 32 | Female | NR 1 (100)  | <i>M. nonliquefaciens</i><br>1 (100) | Penicillin 1 (100)                                | Clinical cure<br>1 (100)<br>Deaths<br>overall 0 |
| Turner et al,               | 1 | 62 | Female | AoV 1 (100) | <i>M. catarrhalis</i> 1              | Penicillin 1 (100)                                | Clinical cure                                   |

|                                |   |     |        |             |                                  |                                              |                                                                 |
|--------------------------------|---|-----|--------|-------------|----------------------------------|----------------------------------------------|-----------------------------------------------------------------|
| 1985 [28]                      |   |     |        |             | (100)                            | Surgical management 1<br>(100)               | 0 (0)<br>Deaths<br>overall 0 (0)<br>Deaths due to<br>IE 1 (100) |
| Sanyal et al,<br>1990 [29]     | 1 | 4.5 | Female | AoV 1 (100) | <i>M. lacunata</i> 1<br>(100)    | Penicillin 1 (100)<br>Aminoglycoside 1 (100) | Clinical cure<br>1 (100)<br>Deaths<br>overall 0                 |
| Periyakoil et<br>al, 1996 [30] | 1 | 19  | Female | MV 1 (100)  | <i>M. catarrhalis</i> 1<br>(100) | Cephalosporin 1 (100)                        | Clinical cure<br>1 (100)<br>Deaths<br>overall 0                 |
| Guttigoli et                   | 1 | 40  | Male   | NR 1 (100)  | <i>M. phenylpyruvica</i>         | Cephalosporin 1 (100)                        | Clinical cure                                                   |

|                           |   |      |      |             |                                  |                                                 |                                                 |
|---------------------------|---|------|------|-------------|----------------------------------|-------------------------------------------------|-------------------------------------------------|
| al, 2000 [31]             |   |      |      |             | 1 (100)                          | Aminoglycoside 1 (100)                          | 1 (100)<br>Deaths<br>overall 0                  |
| Stefanou et al, 2000 [17] | 1 | 37   | Male | MV 1 (100)  | <i>M. catarrhalis</i> 1 (100)    | Aminopenicillin 1 (100)                         | Clinical cure<br>1 (100)<br>Deaths<br>overall 0 |
| Tripodi et al, 2002 [32]  | 1 | 50   | Male | AoV 1 (100) | <i>M. phenylpyruvica</i> 1 (100) | Cephalosporin 1 (100)<br>Aminoglycoside 1 (100) | Clinical cure<br>1 (100)<br>Deaths<br>overall 0 |
| Nagano et al, 2003 [33]   | 1 | 1.25 | Male | NR 1 (100)  | <i>M. lacunata</i> 1 (100)       | Carbapenem 1 (100)                              | Clinical cure<br>1 (100)<br>Deaths              |

|                             |   |                   |        |                                              |                                     |                                                                                                          |                                                             |
|-----------------------------|---|-------------------|--------|----------------------------------------------|-------------------------------------|----------------------------------------------------------------------------------------------------------|-------------------------------------------------------------|
|                             |   |                   |        |                                              |                                     |                                                                                                          | overall 0                                                   |
| Millat et al,<br>2003 [34]  | 1 | 45                | Female | AoV 1 (100)                                  | <i>M. phenylpyruvica</i><br>1 (100) | NR 1 (100)<br><br>Surgical management 1<br>(100)                                                         | Clinical cure<br><br>1 (100)<br><br>Deaths<br><br>overall 0 |
| Maayan et al,<br>2004 [16]  | 4 | 30, 30, 34,<br>45 | 4 Male | AoV 1 (25)<br><br>MV 1 (25)<br><br>NR 2 (50) | <i>M. lacunata</i> 4<br>(100)       | Penicillin 1 (25)<br><br>Aminopenicillin 1 (25)<br><br>Cephalosporin 2 (50)<br><br>Aminoglycoside 3 (75) | Clinical cure<br><br>4 (100)<br><br>Deaths<br><br>overall 0 |
| Kutlesa et al,<br>2007 [35] | 1 | 60                | Female | MV 1 (100)                                   | <i>M. lacunata</i> 1<br>(100)       | Penicillin 1 (100)<br><br>Aminoglycoside 1 (100)<br><br>Surgical management 1<br>(100)                   | Clinical cure<br><br>1 (100)<br><br>Deaths<br><br>overall 0 |
| Noman et al,                | 1 | 42                | Male   | MV 1 (100)                                   | <i>M. lacunata</i> 1                | Penicillin 1 (100)                                                                                       | Clinical cure                                               |

|                           |   |    |        |             |                                      |                                                                                |                                                 |
|---------------------------|---|----|--------|-------------|--------------------------------------|--------------------------------------------------------------------------------|-------------------------------------------------|
| 2008 [36]                 |   |    |        |             | (100)                                |                                                                                | 1 (100)<br>Deaths<br>overall 0                  |
| Akinyemi et al, 2010 [37] | 1 | 67 | Female | MV 1 (100)  | <i>M. nonliquefaciens</i><br>1 (100) | Cephalosporin 1 (100)<br>Surgical management 1 (100)                           | Clinical cure<br>1 (100)<br>Deaths<br>overall 0 |
| Callejo et al, 2010 [38]  | 1 | 34 | Female | MV 1 (100)  | <i>M. lacunata</i> 1 (100)           | Cephalosporin 1 (100)<br>Aminoglycoside 1 (100)<br>Surgical management 1 (100) | Clinical cure<br>1 (100)<br>Deaths<br>overall 0 |
| Rafiq et al, 2011 [39]    | 1 | 64 | Female | AoV 1 (100) | <i>M. nonliquefaciens</i><br>1 (100) | Cephalosporin 1 (100)<br>Quinolone 1 (100)                                     | Clinical cure<br>1 (100)<br>Deaths              |

|                           |   |        |        |                           |                               |                                                 |                                                 |
|---------------------------|---|--------|--------|---------------------------|-------------------------------|-------------------------------------------------|-------------------------------------------------|
|                           |   |        |        |                           |                               |                                                 | overall 0                                       |
| Dasari et al, 2011 [40]   | 1 | 32     | Female | AoV 1 (100)<br>MV 1 (100) | <i>M. lacunata</i> 1 (100)    | Cephalosporin 1 (100)<br>Aminoglycoside 1 (100) | Clinical cure<br>1 (100)<br>Deaths<br>overall 0 |
| Nakayama et al, 2014 [41] | 1 | 74     | Female | MV 1 (100)                | <i>M. lacunata</i> 1 (100)    | Cephalosporin 1 (100)<br>Aminoglycoside 1 (100) | Clinical cure<br>1 (100)<br>Deaths<br>overall 0 |
| Shahani et al, 2015 [42]  | 1 | 63     | Male   | AoV 1 (100)               | <i>M. catarrhalis</i> 1 (100) | Cephalosporin 1 (100)                           | Clinical cure<br>1 (100)<br>Deaths<br>overall 0 |
| Gagnard et al,            | 2 | 51, 75 | Male   | AoV 1 (50)                | <i>M. osloensis</i> 2         | Aminopenicillin 1 (50)                          | Clinical cure                                   |

|                           |   |    |      |             |                                      |                                                                              |                                                                                 |
|---------------------------|---|----|------|-------------|--------------------------------------|------------------------------------------------------------------------------|---------------------------------------------------------------------------------|
| 2015 [43]                 |   |    |      | MV 1 (50)   | (100)                                | Cephalosporin 1 (50)<br>Aminoglycoside 1 (50)<br>Surgical management 2 (100) | 2 (100)<br>Deaths<br>overall 0                                                  |
| Duployez et al, 2017 [44] | 1 | 62 | Male | AoV 1 (100) | <i>M. nonliquefaciens</i><br>1 (100) | Aminopenicillin 1 (100)<br>Cephalosporin 1 (100)<br>Aminoglycoside 1 (100)   | Clinical cure<br>0 (0)<br>Deaths<br>overall 1 (100)<br>Deaths due to IE 1 (100) |
| Paiva et al, 2018 [45]    | 1 | 41 | Male | MV 1 (100)  | <i>M. osloensis</i> 1 (100)          | Aminopenicillin 1 (100)<br>Cephalosporin 1 (100)<br>Surgical management 1    | Clinical cure<br>1 (100)<br>Deaths                                              |



|                           |   |     |        |                           |                               |                                                      |                                                                           |
|---------------------------|---|-----|--------|---------------------------|-------------------------------|------------------------------------------------------|---------------------------------------------------------------------------|
|                           |   |     |        |                           |                               | (100)                                                | overall 0                                                                 |
| Maiorean et al, 2019 [46] | 1 | 65  | Female | MV 1 (100)                | <i>M. catarrhalis</i> 1 (100) | Cephalosporin 1 (100)                                | Clinical cure 1 (100)<br>Deaths overall 0                                 |
| Ahmed et al, 2020 [47]    | 1 | 0.5 | Female | AoV 1 (100)<br>MV 1 (100) | <i>M. catarrhalis</i> 1 (100) | Cephalosporin 1 (100)<br>Surgical management 1 (100) | Clinical cure 0 (0)<br>Deaths overall 1 (100)<br>Deaths due to IE 1 (100) |

<sup>a</sup> Defined as clinical resolution of the infection as a result of treatment.

AoV: aortic valve; MV: mitral valve
